# Supplementary material for: Process evaluation of a national school-based iron supplementation program for adolescent girls in Iran
Source: PubMed Central journal article supplement (PMC4247064; doi:10.1186/1471-2458-14-959), 2014-09-16
Supplement: 12889_2013_7299_MOESM1_ESM.pdf [file 12889_2013_7299_MOESM1_ESM.pdf]

## Questionnaire A (special for students)

School name:

City area:

Date of birth:

1. Do you receive iron pills every week?                      Yes       No
  
2. What do you usually do with the iron pills?
  - a. I always take them in class or after class.
  - b. I take them at home.
  - c. I do not regularly take the pills either at school or at home.
  - d. I never take them.
  - e. Others (please mention it below)
  
3. If you do not take the pills, which of the followings is the reason? (you may choose more than one option)
  - a. I had experienced upset feeling, vomiting, abdominal discomfort, unpleasant taste of pills and feeling of drowsiness/dizziness
  - b. I had no access to drinking water to take pills.
  - c. I did not feel pill consumption was necessary.
  - d. I had been using similar iron supplements at home.
  - e. Suggestions from my close friends
  - f. I was thinking that why my female teachers were not interested to take the same pills.
  - e. Others (please mention it below)
  
4. Is the drinking water available in time of pills distribution?                      Yes       No
  
5. Do you think why you are recommended to take iron pills?
  
6. Apart from the iron distribution in the classroom, what other activities are done to encourage you and your friends to take the tablets? (You may mark more than one choice.)
  - a. Putting up iron-related posters on boards at school hall
  - b. Distribution of iron-related brochures among the students
  - c. Inviting health center professionals to talk about iron topics in school
  - d. Showing movies/video clips regarding iron deficiency anemia
  - e. Speech by school administrators in classrooms or at school grounds about iron related topics
  - f. Inviting parents to school and talking to them about the importance of iron pills for student's health
  - e. Others (if any)

7. Have you ever noticed installed iron-related posters on the school notification boards? Yes  No

8. If yes,

a. What were they encouraging you to do?

b. Which part of the posters was more interesting and caught your attention?  
illustrations  text  color  others (mention it below)

c. Which part of the posters was more effective in conveying message?  
illustrations  text   
both illustrations and texts  others (mention it below)

9. Have principal, vice-principals or health coaches ever talked to you about iron topics at the school? Yes  No

10. If yes,

a. Where was the talking place? Classroom  School ground

b. How long did it take? .....(minutes)

c. How often it was repeated since start of the current school year?

once  twice  three times  more

11. Have your teachers spoken about the iron supplementation at your classrooms? Yes  No

12. If yes,

a. How long did it take? .....(minutes)

b. How often it was repeated since start of current school year?

once  twice  three times  more

13. Have your parents attended to any meeting about iron supplementation program? Yes  No

14. If yes,

a. How long did it take? .....(minutes)

b. How often it was repeated since start of the current school year?

once  twice  three times  more

c. Who were the trainers/facilitators?

health center personnel  principal or vice- principal

health coaches  others (mention it below)

15. Have personnel from health centers had any lectures about iron supplementation program for students at school? Yes  No

16. If yes,

a. Where was the lecture held?

classroom  school ground  school hall

b. How long did it take? .....(minutes)

c. How often it was repeated since start of the current school year?

once  twice  three times  more

d. Were the talks easy to understand? Yes  No

e. Was the intervention venue convenient and comfortable? Yes  No

f. Was there any problem with noise and crowds? Yes  No

17. How much of educator's talk been relevant to iron topics?

extremely  very  moderately  slightly  not at all

18. How do you evaluate the educator?

a. He/she could behave friendly. Yes  No

b. It was easy to communicate with him/her. Yes  No

c. He/she could encourage us to participation. Yes  No

d. He/she could speak clearly and understandably. Yes  No

e. We were free to ask any question. Yes  No

19. Which of the followings had the greatest impact on your decision to consume the iron pills?

a. Health center personnel advices

b. Recommendations made by school principal, vice-principals or teachers

c. Posters

d. Brochures

e. My parents' advices

f. My physician's advices

g. My own knowledge about iron benefits

h. Others (mention it below)

20. How do you see yourself in terms of body iron status?

a. I am severely iron deficient.

b. I have moderate iron deficiency.

c. I don't have any iron deficiency problem.

d. I am better than ideal in terms of iron status.

e. I have no idea.
