# Supplementary material for: Process evaluation of a national school-based iron supplementation program for adolescent girls in Iran
Source: PubMed Central journal article supplement (PMC4247064; doi:10.1186/1471-2458-14-959), 2014-09-16
Supplement: 12889_2013_7299_MOESM2_ESM.pdf [file 12889_2013_7299_MOESM2_ESM.pdf]

## **Questionnaire B (special for teachers)**

School name:

School type:

District area:

### **Teachers**

1. Do you consume iron pills at classroom together with students? Yes  No
2. If no, please mention the reason?
3. Does distribution of iron pills disrupt the teaching process? Yes  No
4. If yes, please mention how?
5. Have you ever attended any educational session regarding the intervention program?  
Yes  No
6. If yes, please mention the following items:
  - a. Place: in school  outside the school
  - b. Session duration: .....(minutes)
7. What do you suggest for more effectiveness of the program?
