# Supplementary material for: Process evaluation of a national school-based iron supplementation program for adolescent girls in Iran
Source: PubMed Central journal article supplement (PMC4247064; doi:10.1186/1471-2458-14-959), 2014-09-16
Supplement: 12889_2013_7299_MOESM3_ESM.pdf [file 12889_2013_7299_MOESM3_ESM.pdf]

## Questionnaire C (special for school administrators)

School name:

School type:

District area:

1. When did you start distribution of iron tablets in your school?
2. When do you finish distribution of iron tablets in your school?
3. Are iron pills distributed each week on a regular basis? Yes  No
4. How many educational sessions regarding the iron supplementation program have been delivered for school administrators?  
one  two  three  any
5. If any, please indicate the followings:
  - Venue: school  district health center  etc.
  - Duration: .....(minutes)
  - Which organization had taken responsibility of the session(s)?
  - Was the session venue convenient and comfortable? Yes  No
  - Was the session venue easy to access? Yes  No
  - Was it any cost to attend the meeting venue? Yes  No
  - Was it expensive to attend the meeting venue? Yes  No
  - If you had to pay any cost, please mention the type from the following list:
    - a. traveling cost
    - b. program participation cost
    - c. childcare cost
    - d. others (mention it below)
  - How much of educator's talk been relevant to iron topics?  
extremely  very  moderately  slightly  not at all
  - Which instrument the educator used for education?
  - Were the talks easy to understand? Yes  No
  - How many times did you participate in the sessions?  
one  two  three  more
  - How do you evaluate the educators?
    - a. He/she could behave friendly. Yes  No
    - b. It was easy to communicate with him/her. Yes  No
    - c. He/she could encourage us to participation. Yes  No
    - d. He/she could speak clearly and understandably. Yes  No

- e. We felt free to ask our questions, if any. Yes  No
6. What activities have you performed in your school about the program goals?
7. How many education sessions have you provided for students about the program?  
 nothing  one  two  three or more
8. If any,  
 - How long did the educational session take for the students?  
 - Where did you hold the sessions?
9. How many education sessions have you provided for parents about the program?  
 nothing  one  two  three or more
10. If any,  
 - How long did the educational session take for the parents?  
 - Where did you hold the sessions?
11. Have you received any iron related posters from health center? Yes  No
12. If yes, please answer the following questions:  
 - Did you install the posters to school hall? Yes  No   
 - How long the posters were kept?
13. Have you received any iron-related brochures from health center? Yes  No
14. If yes, please answer the following questions:  
 - Did you distribute them among the students? Yes  No
15. Did you find the posters and brochures relevant? Yes  No
16. Do you think the posters and brochures were effective? Yes  No
17. If no, which of the followings was the reason?  
 a. They had more text and fewer figures.  
 b. They were too complex.  
 c. They were not enough in number  
 d. They were too small to attract students' attention  
 e. Others (mention it)
18. What do you think was the major barriers for program implementation?
19. What do you suggest to improve effectiveness of the program?
